# Supplementary material for: A scalable, low-cost and green strategy for the synthesis of ultralong hydroxyapatite nanowires using peanut oil
Source: Royal Society of Chemistry journal article supplement (doi:10.1039/d2ce00225f), 2022-01-01
Supplement: d2ce00225f2.pdf [file d2ce00225f2.pdf]

# Electronic Supplementary Information (ESI)

## **A scalable, low-cost and green strategy for the synthesis of ultralong hydroxyapatite nanowires using peanut oil**

Yu-Qiao Chen,<sup>ab</sup> Ying-Jie Zhu,<sup>\*ab</sup> Zhong-Yi Wang,<sup>ab</sup> Han-Ping Yu<sup>a</sup> and Zhi-Chao

Xiong<sup>\*a</sup>

<sup>a</sup> *State Key Laboratory of High Performance Ceramics and Superfine Microstructure, Shanghai Institute of Ceramics, Chinese Academy of Sciences, Shanghai 200050, China*

<sup>b</sup> *Center of Materials Science and Optoelectronics Engineering, University of Chinese Academy of Sciences, Beijing 100049, China*

\* Corresponding author. State Key Laboratory of High Performance Ceramics and Superfine Microstructure, Shanghai Institute of Ceramics, Chinese Academy of Sciences, Shanghai 200050, China.

*E-mail:* y.j.zhu@mail.sic.ac.cn (Y. J. Zhu), zcxiong@mail.sic.ac.cn (Z. C. Xiong).

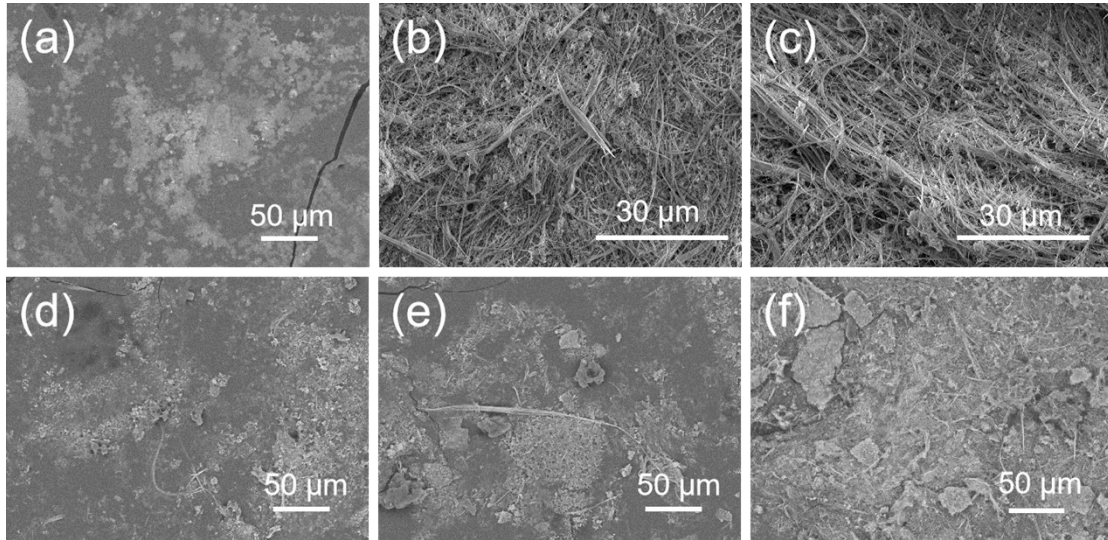

**Figure S1.** SEM micrographs of the products prepared by the oleate precursor solvothermal method using different contents of peanut oil at a Ca/P molar ratio of 1:2 at 180 °C for 24 h. (a) 3.744 g; (b) 6.552 g; (c) 9.360 g; (d) 12.168 g; (e) 14.976 g; (f) 17.784 g.

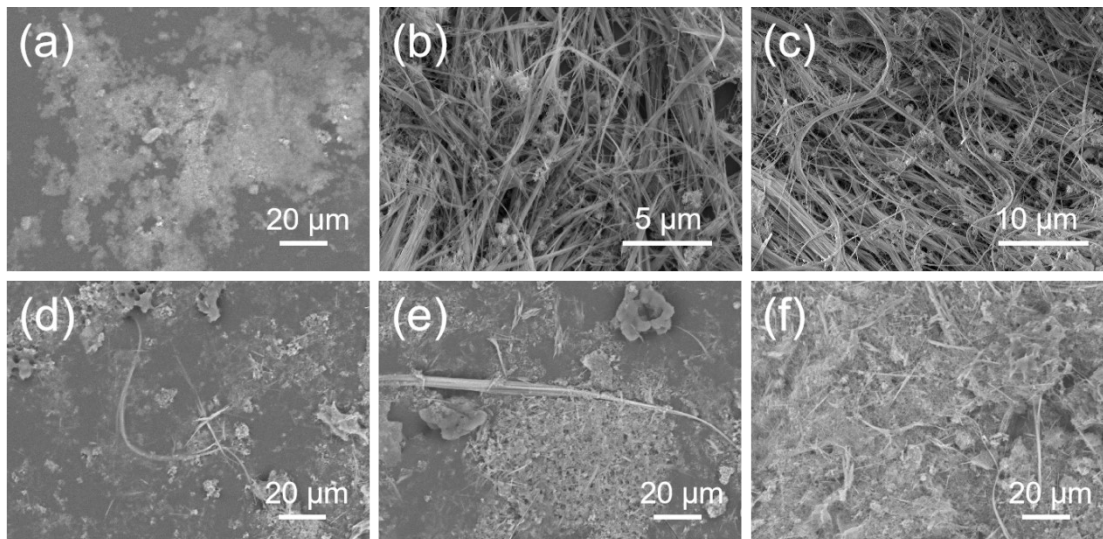

**Figure S2.** SEM micrographs at a higher magnification of the products prepared by the oleate precursor solvothermal method using different contents of peanut oil at a Ca/P molar ratio of 1:2 at 180 °C for 24 h. (a) 3.744 g; (b) 6.552 g; (c) 9.360 g; (d) 12.168 g; (e) 14.976 g; (f) 17.784 g.

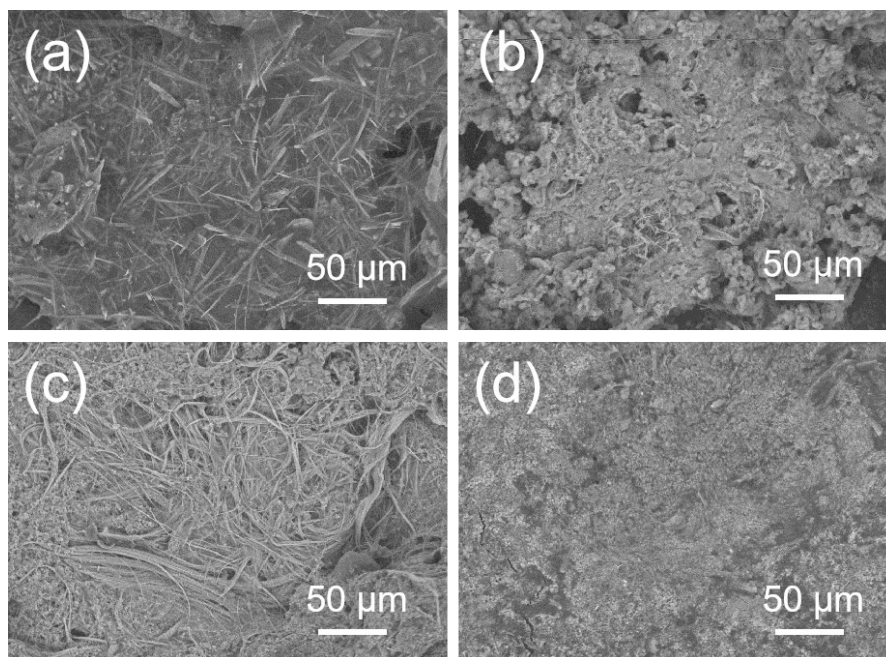

**Figure S3.** SEM micrographs of the products synthesized by the oleate precursor solvothermal method using 9.360 g peanut oil and different weights of NaOH at a Ca/P molar ratio of 1:1 at 180 °C for 24 h. (a) 0.200 g; (b) 0.500 g; (c) 1.050 g; (d) 2.000 g.

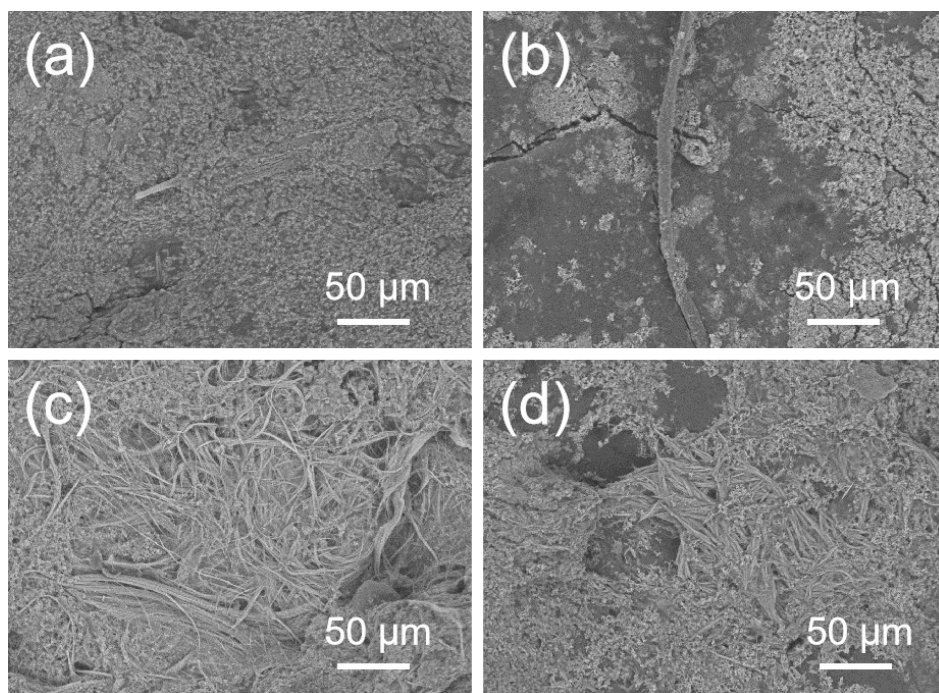

**Figure S4.** SEM micrographs of the products synthesized by the oleate precursor solvothermal method using 9.360 g peanut oil, 1.050 g NaOH and different weights of methanol at a Ca/P molar ratio of 1:1 at 180 °C for 24 h. (a) 2.000 g; (b) 3.000 g; (c) 4.750 g; (d) 6.000 g.

**Movie S1.** Video of the nonflammable test of the ultralong HAP nanowire-based fire-resistant inorganic paper being heated in the flame of an alcohol lamp for 2 min.
